# Supplementary material for: Improving hydrogenation of 4-nitrophenol using Pd catalysts homogeneously anchored on WN-TiO2: a synergistic interaction between WN and Pd nanoparticles
Source: Royal Society of Chemistry journal article supplement (doi:10.1039/d5qi00050e), 2025-01-01
Supplement: d5qi00050e1.pdf [file d5qi00050e1.pdf]

## Supplementary Information

### Improving Hydrogenation of 4-Nitrophenol using Pd catalysts homogenously anchored on WN-TiO<sub>2</sub>: A synergistic interaction between WN and Pd nanoparticles

Yanping Dong,<sup>a</sup> Xiqiang Tian,<sup>\*b</sup> Enxin Liu,<sup>b</sup> Shoulei Huang<sup>\*b</sup> and Muhammad Zahid<sup>\*c</sup>

<sup>a</sup> *School of Food Engineering, Department of Chemistry, Harbin University, Harbin, Heilongjiang 150086, P. R. China*

<sup>b</sup> *Heilongjiang Province Key Laboratory of Environmental Catalysis and Energy Storage Materials, Department of Food and Pharmaceutical Engineering, Suihua University, Suihua, 152061, P. R. China*

<sup>c</sup> *Interdisciplinary Research Center for Refining and Advanced Chemicals, King Fahd University of Petroleum and Minerals, Dhahran 31261, Saudi Arabia*

**\* Corresponding author**

**E-mail address:** tianxiqiang@163.com (X. Q. Tian), , huangshoulei@126.com (S. L. Huang), muhammad93zahid@uop.edu.pk (M. Zahid)

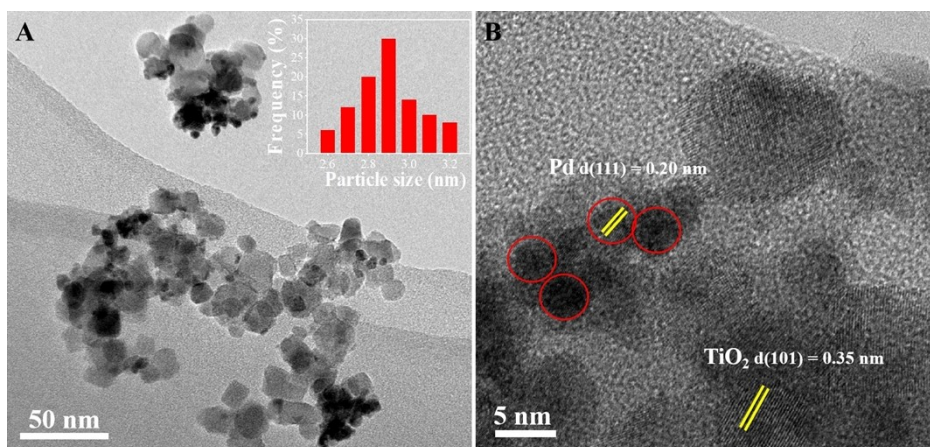

Fig. S1 TEM images of Pd@TiO<sub>2</sub> (inset: size distribution of the Pd NPs).

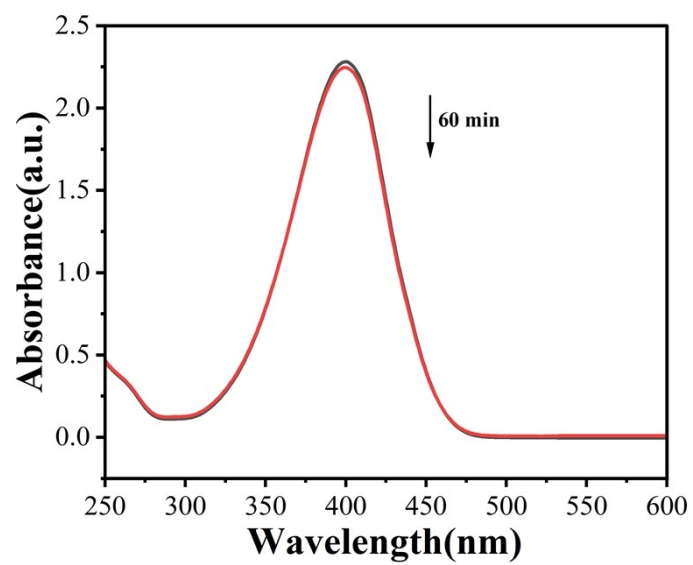

Fig. S2 UV-vis spectra of the 4-NP hydrogenation reaction at a certain time interval over TiO<sub>2</sub>.

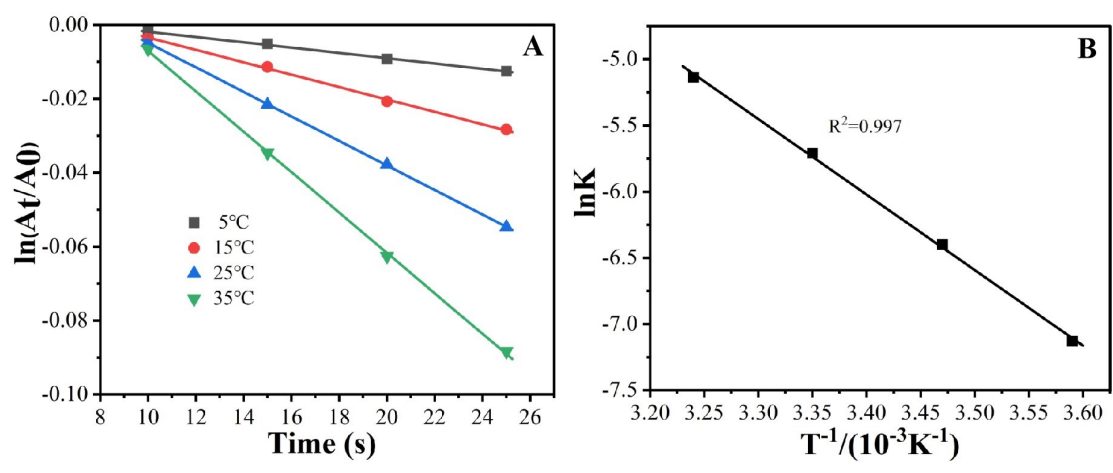

Fig. S3 The relation of  $\ln A_t/A_0$  versus time for the hydrogenation of 4-NP over four different temperature (A) and Plots of  $\ln k$  against  $T^{-1}$  (B) over Pd@TiO<sub>2</sub>.

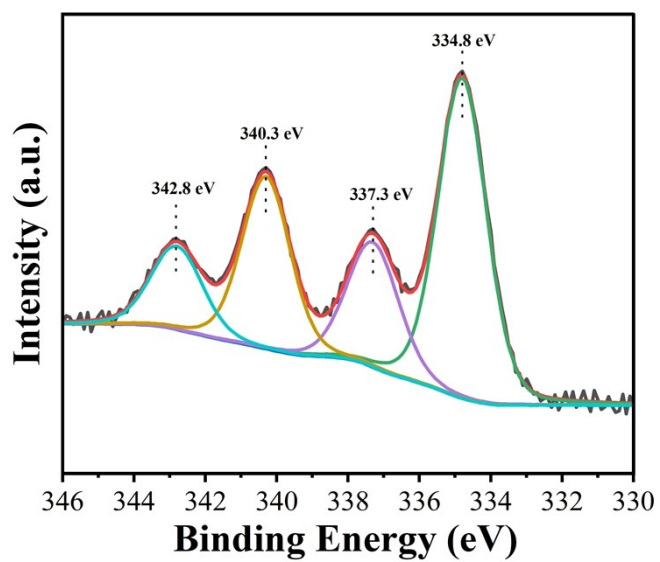

Fig. S4 Pd3d XPS spectra of the used Pd@WN-TiO<sub>2</sub> catalyst.

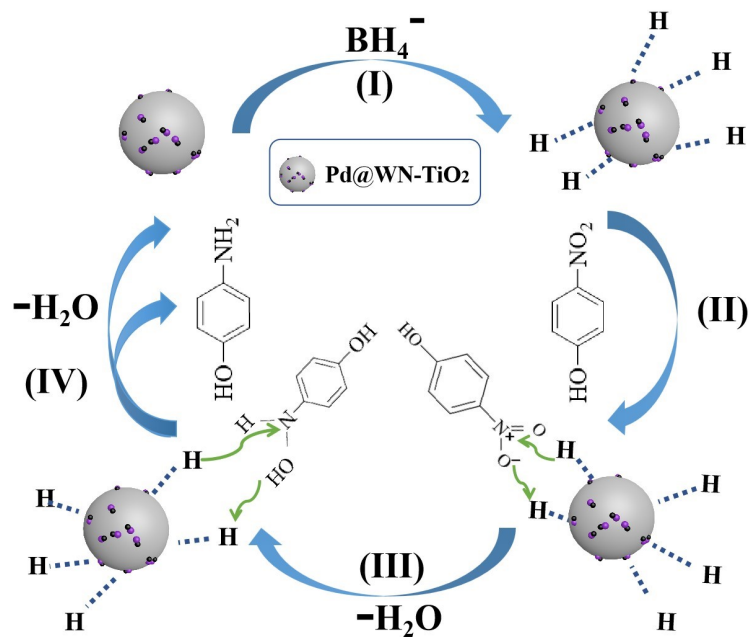

Fig. S5 Catalytic pathway of 4-NP to 4-AP over 1.0wt%Pd@WN-TiO<sub>2</sub> in the presence of NaBH<sub>4</sub>.

Table S1. The performance of our Pd@WN-TiO<sub>2</sub> and recent reported noble metal-based catalysts.

| No | Catalyst                              | Noble metal<br>Content (wt%) | C <sub>4</sub> -NP<br>(mmol/L) | Time<br>(S) | K<br>(S <sup>-1</sup> ) | References |
|----|---------------------------------------|------------------------------|--------------------------------|-------------|-------------------------|------------|
| 1  | Pd@WN-TiO <sub>2</sub>                | 1.0                          | 0.23                           | 180         | 1.07×10 <sup>-2</sup>   | This work  |
| 2  | PPy/TiO <sub>2</sub> /Pd              | 2.1                          | 0.11                           | 420         | 1.22×10 <sup>-2</sup>   | 1          |
| 3  | Pd/ZnO                                | 3.39                         | 0.11                           | 720         | 5.8×10 <sup>-3</sup>    | 2          |
| 4  | Pd-Ni/rGO                             | 30                           | 0.5                            | 720         | 2.66×10 <sup>-3</sup>   | 3          |
| 5  | Ag/SiO <sub>2</sub>                   | 5.46                         | 0.02                           | 780         | 3.2×10 <sup>-3</sup>    | 4          |
| 6  | Pd@Fe <sub>3</sub> O <sub>4</sub>     | 1.58                         | 0.1                            | 300         | 0.354                   | 5          |
| 7  | Au/g-C <sub>3</sub> N <sub>4</sub> -6 | 6.0                          | 0.072                          | 480         | 0.356                   | 6          |

## References

- 1 M. L. Zou, M. L. Du, M. Zhang, T. T. Yang, H. Zhu, P. Wang, Synthesis and deposition of ultrafine noble metallic nanoparticles on amino-functionalized halloysite nanotubes and their catalytic application, *Mater. Res. Bull.*, 2015, **61**, 375-382.
- 2 Z. Bao, Y. Yuan, C. Leng, L. Li, K. Zhao, Z. Sun, One-Pot Synthesis of Noble Metal/Zinc Oxide Composites with Controllable Morphology and High Catalytic Performance, *ACS Appl. Mater. Inter.*, 2017, **9**, 16417-16425.
- 3 T. A. Revathy, S. Dhanavel, T. Sivaranjani, V. Narayanan, T. Maiyalagan, A. Stephen, Highly active graphene-supported palladium-nickel alloy nanoparticles for catalytic reduction of 4-nitrophenol, *Appl. Surf. Sci.*, 2018, **449**, 764-771.
- 4 C. R. Li, J. Yao, Y. Huang, C. Y. Xu, D. Y. Lou, Z. Y. Wu, W. Sun, S. M. Zhang, Y. G. Li, L. He, X. H. Zhang, Salt-templated growth of monodisperse hollow nanostructures, *J. Mater. Chem. A*, 2019, **7**, 1404-1409.
- 5 S. F. Jiang, L. L. Ling, Z. R. Xu, W. J. Liu, and H. Jiang, Enhancing the Catalytic Activity and Stability of Noble Metal Nanoparticles by the Strong Interaction of Magnetic Biochar

Support, *Ind. Eng. Chem. Res.*, 2018, **57**, 13055-13064.

6 Y. S. Fu, T. Huang, B. Q. Jia, J. W. Zhu, X. Wang, Reduction of nitrophenols to aminophenols under concerted catalysis by Au/g-C<sub>3</sub>N<sub>4</sub> contact system, *Appl. Catal. B-Environ.*, 2017, **202**, 430-437.

Table S2. Comparison of the activation energies for recent reported noble metal catalysts.

| No | Catalyst                          | Noble metal Content (wt%) | C <sub>4-NP</sub> (mmol/L) | Time (S) | Ea(kJ/mol) | References |
|----|-----------------------------------|---------------------------|----------------------------|----------|------------|------------|
| 1  | Pd@WN-TiO <sub>2</sub>            | 1.0                       | 0.23                       | 180      | 38.2       | This work  |
| 2  | Ag@Pt/sepiolite                   | 2                         | 0.2                        | 900      | 69.02      | 1          |
| 3  | SPB-30-Pd9                        | -                         | 0.1                        | 1200     | 44         | 2          |
| 4  | Pd/TiO <sub>2</sub> -BT           | 1.0                       | 0.25                       | 120      | 45.6       | 3          |
| 5  | Pd/TiO <sub>2</sub> -FT           | 1.0                       | 0.25                       | 120      | 43.1       | 3          |
| 6  | Pd/Al <sub>2</sub> O <sub>3</sub> | 0.6                       | 0.1                        | 3600     | 43         | 4          |
| 7  | Au@Pd                             | -                         | 0.17                       | -        | 43.32      | 5          |
| 8  | Pt/MSPB                           | 9.57                      | 0.11                       | 900      | 49         | 6          |

## References

- 1 Y. Ma, X. Y. Wu, G. K. Zhang, Core-shell Ag@Pt nanoparticles supported on sepiolite nanofibers for the catalytic reduction of nitrophenols in water: Enhanced catalytic performance and DFT study, *Appl. Catal. B-Environ.*, 2017, **205**, 262-270.
- 2 Y. Mei, Y. Lu, F. Polzer, M. Ballauff, M. Drechsler, Catalytic activity of palladium nanoparticles encapsulated in spherical polyelectrolyte brushes and core-shell microgels, *Chem. Mater.*, 2007, **19**, 1062-1069.
- 3 X. Q. Tian, M. Zahid, W. Sun, Y. J. Zhu, Facile fabrication of TiO<sub>2</sub> with 3D hierarchical structure and its supported Pd catalysts for high catalytic hydrogenation performance of 4-Nitrophenol to 4-Aminophenol, *Appl. Surf. Sci.*, 2021, **566**, 150615.
- 4 S. Arora, P. Kapoor, M. L. Singla, Catalytic studies of palladium nanoparticles immobilized on alumina synthesized by a simple physical precipitation method, *React. Kinet. Mech. Catal.*, 2010, **99**, 157-165.
- 5 Y. Cui, K. B. Ma, Z. Chen, J. L. Yang, Z. G. Geng, J. Zeng, Atomic-level insights into strain effect on p-nitrophenol reduction via Au@Pd core-shell nanocubes as an ideal platform,

*J. Catal.*, 2020, **381**, 427-433.

6 S. Wu, J. L. Kaiser, X. H. Guo, L. Li, Y. Lu, M. Ballauff, Recoverable Platinum Nanocatalysts Immobilized on Magnetic Spherical Polyelectrolyte Brushes, *Ind. Eng. Chem. Res.*, 2012, **51**, 5608-5614.
